# Supplementary material
Source: Research Square preprint supplement (doi:10.21203/rs.3.rs-9328730/v1)
Supplement: Supplementary file 5 [file f1246a6e6fd10c2e570ddf03.docx]

**Supplementary File 1:** Usual care prostate cancer screening information

**Supplementary File 2:** Patient-facing summary report

**Supplementary File 3:** Frequently Asked Questions (FAQ) document

**Supplemental File 4:** Interview guide
